# Supplementary material for: Progress in validation of rotor aerodynamic codes using field data
Source: Copernicus journal article supplement (doi:10.5194/wes-2022-51), 2022-06-28
Supplement: Supplementary file 1 [file wes-2022-51_supplement_28062022.pdf › wes-2022-51_supplement_28062022.pdf]

(a)  $r/R=33\%$

(b)  $r/R=48\%$

(c)  $r/R=76\%$

(d)  $r/R=92\%$

Figure 7: Animated version of Figure 7 from the manuscript. Pressure distribution variation with rotor azimuth angle, case IV.2.1

(a)  $r/R=33\%$

(b)  $r/R=48\%$

(c)  $r/R=76\%$

(d)  $r/R=92\%$

Figure 8: Animation version of Figure 8 from the manuscript. Pressure distribution variation with rotor azimuth angle, case IV.2.2
